# Supplementary material for: Quantitative analysis of sequential nucleic acid elution from silica paramagnetic beads
Source: Royal Society of Chemistry journal article supplement (doi:10.1039/d6an00127k), 2026-05-11
Supplement: d6an00127k1.pdf [file d6an00127k1.pdf]

## Supplementary Material

**Title: Quantitative Analysis of Sequential Nucleic Acid Elution from Silica Paramagnetic Beads**

**Authors:** Asher Varon<sup>a</sup>, Justin Schares<sup>b</sup>, Kuangwen Hsieh<sup>a</sup>, Bradley Downs<sup>c</sup>, Tza-Huei Wang<sup>\*a,c,d</sup>

<sup>a</sup>Department of Mechanical Engineering, Johns Hopkins University, Baltimore, MD 21218, USA

<sup>b</sup>Corteva Agriscience, Johnston, IA 50131, USA

<sup>c</sup>Institute for NanoBiotechnology, Johns Hopkins University, Baltimore, MD 21218, USA

<sup>d</sup>Department of Biomedical Engineering, Johns Hopkins University, Baltimore, MD 21218, USA

\* To whom the correspondence should be addressed.

**T.H.W.**

3400 N. Charles Street, 200A, Shaffer Hall, Baltimore, MD 21218

Telephone: (410) 516-7086

Fax: (410) 516-7254

Email: thwang@jhu.edu

# Table of Contents

**Figure S1.** Training dataset for the soybean lysate - trait 1 large oligonucleotide.

**Figure S2.** Training dataset for the soybean lysate - trait 2 large oligonucleotide.

**Figure S3.** Training dataset for the small synthetic, “gBlock” oligonucleotide.

**Figure S4.** Statistical analysis of oligonucleotide size elution decay constants.

**Figure S5.** Standard curves for singleplex PCR oligonucleotide samples.

**Figure S6.** Standard curves for duplex PCR of large oligonucleotides in presence of the small oligonucleotide.

Training Set: Large Soybean Genome - Trait 1

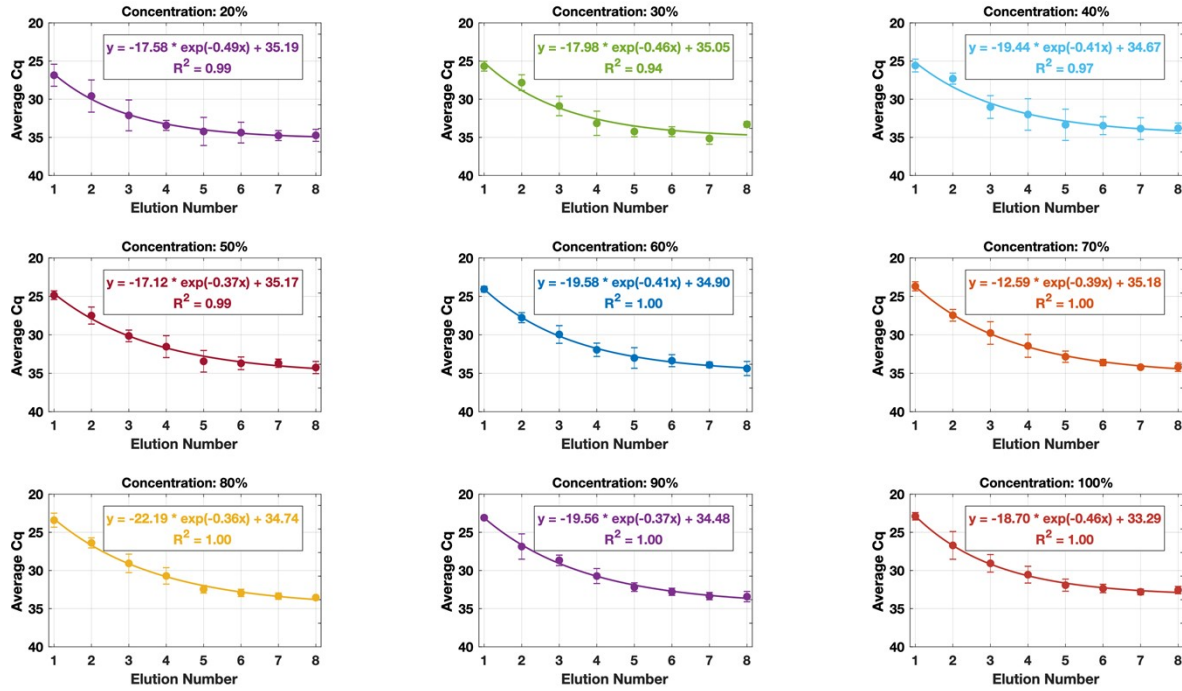

**Figure S1: Training dataset for the trait 1 soybean genome.** Trait 1 starting sample concentrations from 20%-100%, in 10% increments fitted to our hypothesized generalized model, as described in Equation 3, without fixed decay constants. Data represent mean Cq  $\pm$ SD from triplicate experiments (n = 3).

Training Set: Large Soybean Genome - Trait 2

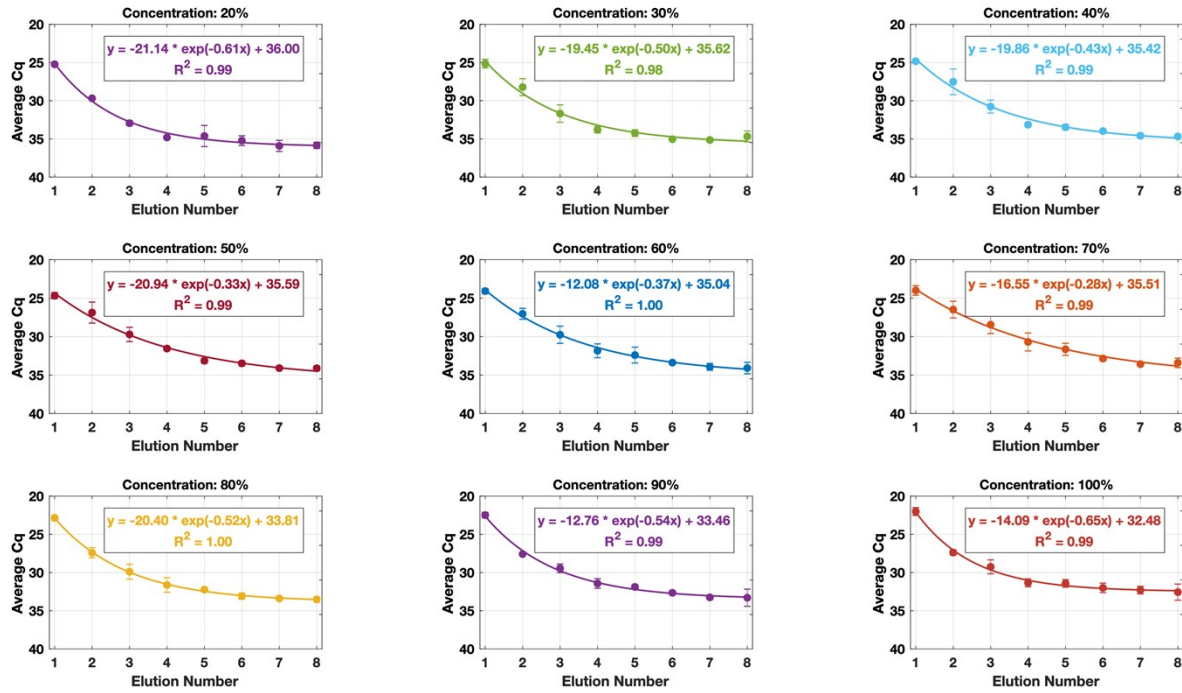

**Figure S2: Training dataset for the trait 2 soybean genome.** Trait 2 starting sample concentrations from 20%-100%, in 10% increments fitted to our hypothesized generalized model, as described in Equation 3, without fixed decay constants. Data represent mean Cq  $\pm$ SD from triplicate experiments (n = 3).

Training Set: Small Synthetic Oligonucleotide

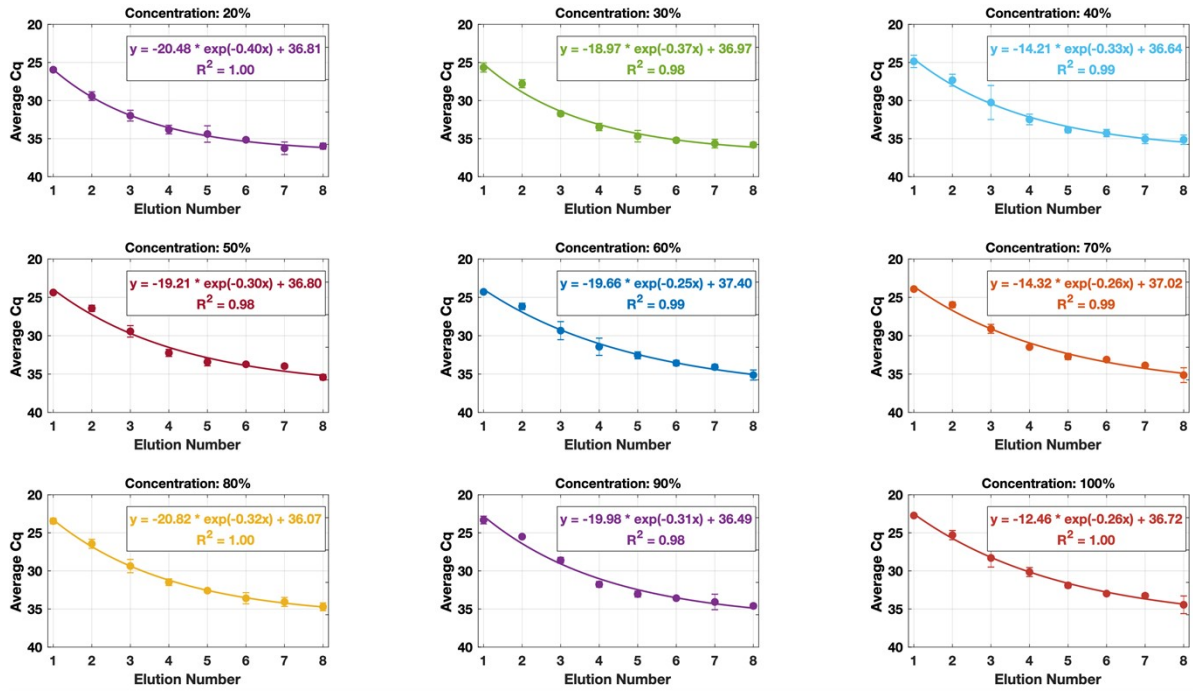

**Figure S3: Training dataset for the double-stranded DNA fragment (gBlock).** gBlock starting sample concentrations from 20%-100%, in 10% increments fitted to our hypothesized generalized model, as described in Equation 3, without fixed decay constants. Data represent mean Cq  $\pm$ SD from triplicate experiments (n = 3).

## Comparison of Elution Rate

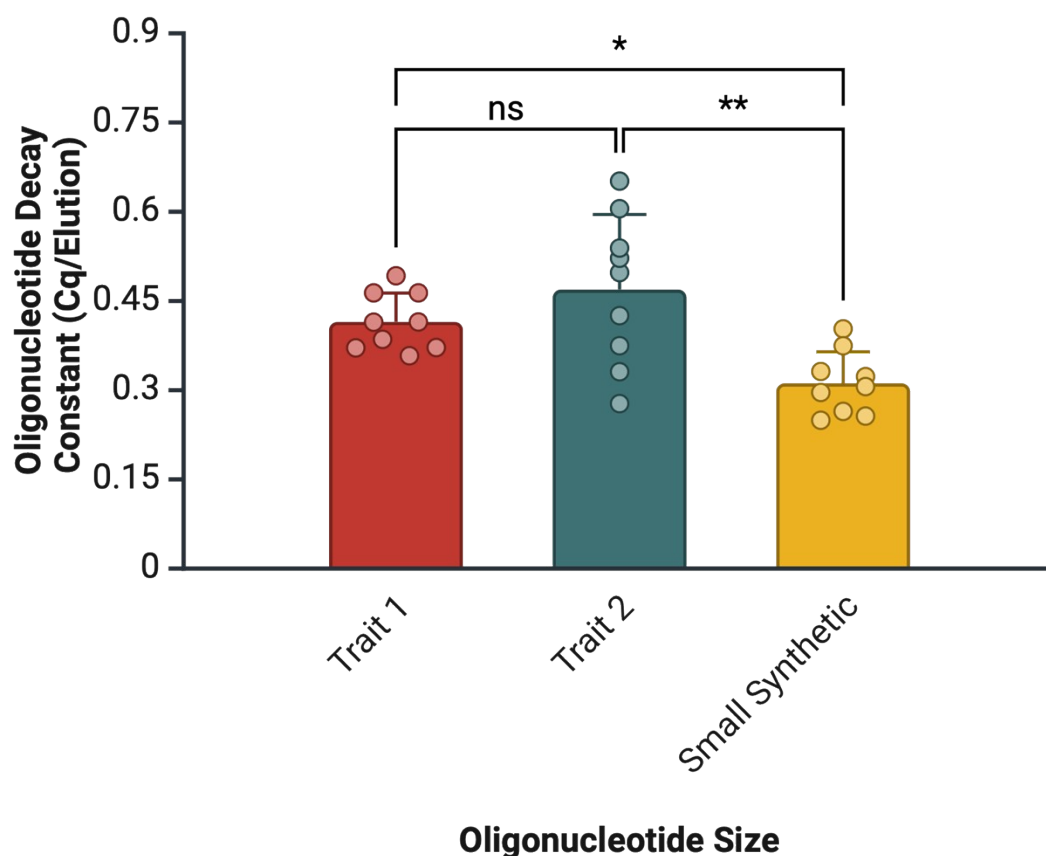

**Figure S4: Statistical analysis of oligonucleotide size elution decay constant.** Decay constants derived from the generalized models (Figs. S1–S3) were averaged for each target, and the resulting means were compared using the nonparametric Kruskal–Wallis test followed by Dunn’s multiple-comparisons post hoc analysis. Because each target comprised a small sample size ( $n = 9$ ) and exhibited substantial variability in Cq measurements, normality was not assumed. Comparisons between the two soybean genome traits yielded an adjusted p-value of 1.0000, indicating no statistically significant difference. In contrast, comparisons between the double-stranded DNA fragment (gBlock) and the soybean genome targets yielded adjusted p-values of 0.03785 (trait 1) and 0.004022 (trait 2), respectively. The mean decay constant for each target was subsequently used for model validation.

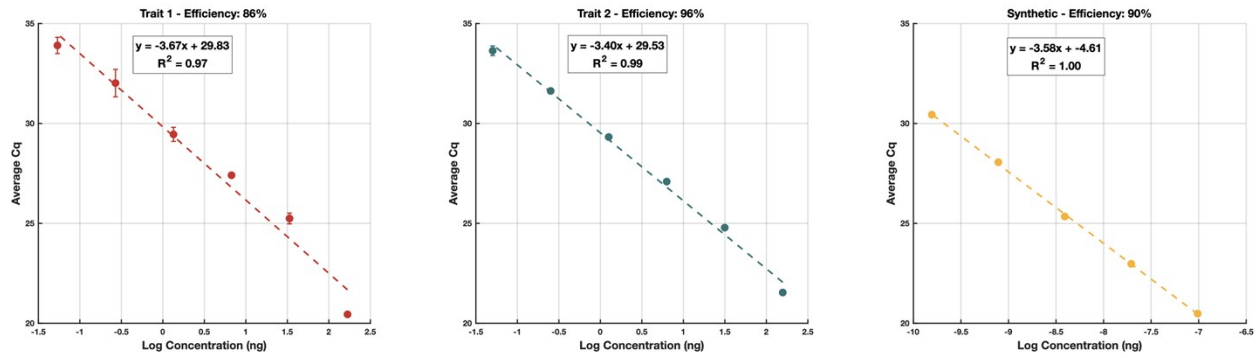

**Figure S5: Standard curves for singleplex PCR targets.** Subsequent five-point dilutions were performed for each target, and standard curves were fitted via linear regression. Soybean genomic DNA for trait 1 yielded a PCR efficiency of 86%, while trait 2 yielded an efficiency of 96%. The double-stranded DNA fragment (gBlock) yielded a PCR efficiency of 90%. Data represent mean  $\pm$ SD from triplicate experiments ( $n = 3$ ).

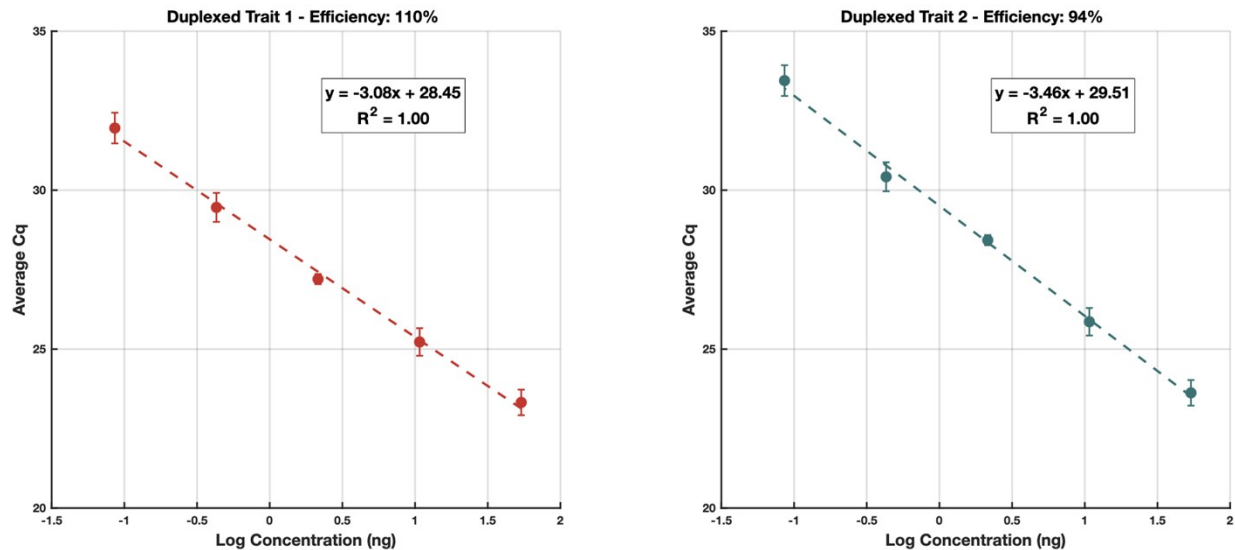

**Figure S6: Standard curves for duplexed PCR of genomic DNA targets in the presence of the double-stranded DNA fragment (gBlock).** Subsequent five-point dilutions were performed for each target in a duplex PCR format, and standard curves were fitted via linear regression. Trait 1 yielded a duplex PCR efficiency of 110%, while trait 2 yielded an efficiency of 94%. Data represent mean  $\pm$ SD from triplicate experiments ( $n = 3$ ).
